# Supplementary material for: [18F]MAGL-4-11 positron emission tomography molecular imaging of monoacylglycerol lipase changes in preclinical liver fibrosis models
Source: PubMed Central journal article supplement — Acta Pharm Sin B. 2021 Jul 17;12(1):308–15. doi: 10.1016/j.apsb.2021.07.007 (PMC8799882; doi:10.1016/j.apsb.2021.07.007), 2021-07-17
Supplement: mmc1.pdf [file mmc1.pdf]

## Supporting Information for

### Original article

#### **[<sup>18</sup>F]MAGL-4-11 positron emission tomography molecular imaging of monoacylglycerol lipase changes in preclinical liver fibrosis models**

Tuo Shao<sup>a,b,†</sup>, Zhen Chen<sup>a,†</sup>, Jian Rong<sup>a,†</sup>, Vasily Belov<sup>a,c</sup>, Jiahui Chen<sup>a</sup>, Andre Jeyarajan<sup>b</sup>, Xiaoyun Deng<sup>a</sup>, Hualong Fu<sup>a</sup>, Qingzhen Yu<sup>a</sup>, Steve H. Rwema<sup>b</sup>, Wenyu Lin<sup>b</sup>, Mikhail Papisov<sup>a,c</sup>, Lee Josephson<sup>a</sup>, Raymond T. Chung<sup>b,\*</sup>, Steven H. Liang<sup>a,\*</sup>

<sup>a</sup>*Division of Nuclear Medicine and Molecular Imaging, Department of Radiology, Massachusetts General Hospital and Harvard Medical School, Boston, MA 02114, USA*

<sup>b</sup>*Liver Center and Gastrointestinal Division, Department of Medicine, Massachusetts General Hospital, Harvard Medical School, Boston, MA 02114, USA*

<sup>c</sup>*Shriners Hospitals for Children-Boston Boston, MA 02114, USA*

<sup>†</sup>These authors contributed equally to this work.

Received 22 February 2021; received in revised form 6 June 2021; accepted 1 July 2021

<sup>†</sup>These authors contributed equally to this work.

\*Corresponding authors. Tel.: +1 617 724 7562, fax: +1 617 643 0446 (Raymond T. Chung); Tel.: +1 617 726 6107, fax: +1 617 726 6165 (Steven H. Liang).

E-mail addresses: [Chung.Raymond@mgh.harvard.edu](mailto:Chung.Raymond@mgh.harvard.edu) (Raymond T. Chung), [liang.steven@mgh.harvard.edu](mailto:liang.steven@mgh.harvard.edu) (Steven H. Liang).

## Supplementary method

### **Radiosynthesis of [<sup>18</sup>F]MAGL-4-11 ((4-(1-(4-(3-(fluoro-<sup>18</sup>F)pyrrolidin-1-yl)benzoyl)azetidin-3-yl)piperazin-1-yl)(thiazol-2-yl)methanone)**

The general labeling procedure for [<sup>18</sup>F]MAGL-4-11 formation was described previously<sup>1</sup>. The cyclotron-produced [<sup>18</sup>F] F<sup>-</sup> was separated from H<sub>2</sub><sup>18</sup>O using the Sep-Pak Accell Plus QMA Plus Light cartridge (Waters; Milford, MA, USA). The produced [<sup>18</sup>F]F<sup>-</sup> was eluted from the cartridge with a mixture of aqueous K<sub>2</sub>CO<sub>3</sub> (4 mg in 200 μL DMSO) and a solution of 4,7,13,16,21,24-hexaoxa-1,10-diazabicyclo[8,8,8]hexacosane (Kryptofix222; 7.5 mg) in CH<sub>3</sub>CN (200 μL), and transferred to a reaction vessel in the hot cell. After drying [<sup>18</sup>F]KF solution at 120 °C for 30 min to remove water and CH<sub>3</sub>CN, a solution of mesylate precursor (2.0 mg) in anhydrous DMSO (300 μL) was then added. The vessel was heated at 120 °C for 10 min, then diluted with HPLC mobile phase (500 μL), followed by injection into an HPLC column. HPLC purification was performed on an X Bridge Prep C18 column (10 × 250 mm, 5 μm) using a mobile phase of CH<sub>3</sub>CN/H<sub>2</sub>O/Et<sub>3</sub>N (30/70/0.1) at a flowrate of 5.0 mL/min. The radioactive fraction corresponding to the desired product was collected in a sterile flask, evaporated to dryness in vacuo, and reformulated in PBS containing 5% EtOH. The synthesis time was ca. 70 min from end of bombardment. Radiochemical and chemical purity were measured by an analytical HPLC (X Bridge Prep C18 column (4.6 × 250 mm, 5 μm) using a mobile phase of CH<sub>3</sub>CN / H<sub>2</sub>O + 0.1% Et<sub>3</sub>N (30/70) at a flow rate of 1.0 mL/min. The product identity was confirmed by the co-injection with unlabeled MAGL-4-11. Radiochemical yield was 39.3 ± 13.7% (*n* = 5) decay-corrected based on [<sup>18</sup>F]F<sup>-</sup> with >99% radiochemical purity, and the molar activity was 111.8–328.7 GBq/μmol (3.03–8.87 Ci/μmol) (Fig. S3).

**Table S1. Characteristics of the liver fibrosis patients**

| Pts ID | Fibrosis Grades | Age (yr) | Sex | Race  | Ethnicity    |
|--------|-----------------|----------|-----|-------|--------------|
| Pts 1  | F0              | 65       | M   | White | Non-Hispanic |
| Pts 2  | F0              | 72       | M   | White | Non-Hispanic |
| Pts 3  | F0              | 65       | M   | White | Non-Hispanic |
| Pts 4  | F1              | 84       | M   | White | Non-Hispanic |
| Pts 5  | F1              | 60       | M   | White | Non-Hispanic |
| Pts 6  | F1              | 64       | M   | White | Non-Hispanic |
| Pts 7  | F2              | 54       | M   | White | Non-Hispanic |
| Pts 8  | F2              | 56       | M   | White | Non-Hispanic |
| Pts 9  | F2              | 58       | F   | White | Non-Hispanic |

**Table S2 Primers used for qPCR.**

| Gene name     | Forward sequence 5' -> 3' | Reverse sequence 5' -> 3' |
|---------------|---------------------------|---------------------------|
| CB1           | CACCTTCCGCACCATCACCAC     | GTCTCCCGCAGTCATCTTCTCTTG  |
| DAGL $\alpha$ | AGAATGTCACCCTCGGAATGG     | GTGGCTCTCAGCTTGACAAAGG    |
| MAGL          | CAAGGCCCTCATCTTTGTGT      | ACGTGGAAGTCAGACACTAC      |
| FAAH          | CCCAGATGGAACATTACAGG      | CAGGATGACTGGTTTTTCAGG     |
| NAPE-PLD      | CACGGTAATGGTGGAAATGG      | GTCCAGATGGTCATAGTGGTTG    |
| 18s rRNA      | GGGAGCCTGAGAAACGG         | GGGTCGGGAGTGGGTAATTT      |

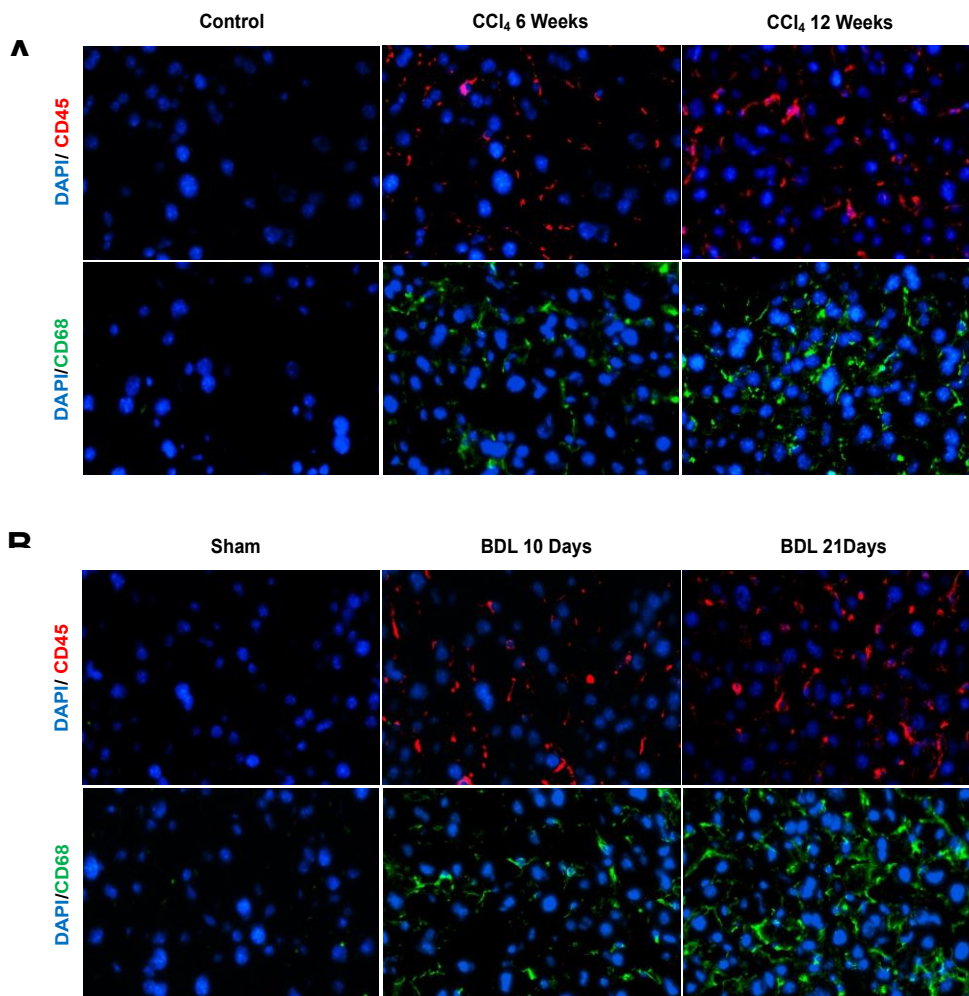

**Figure S1** Hepatic panleukocyte (CD45) and macrophage (CD68) expression after CCl<sub>4</sub> (A) and BDL (B) treatment.

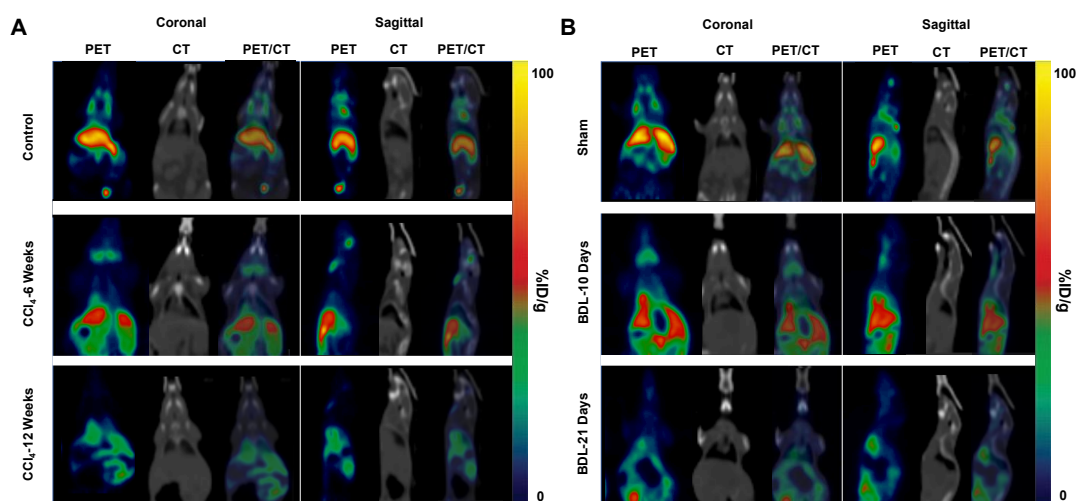

**Figure S2** Coronal and sagittal images of [<sup>18</sup>F]MAGL-4-11/PET-CT imaging hepatic MAGL expression with mild and severe CCl<sub>4</sub> (A) and BDL (B) mice.

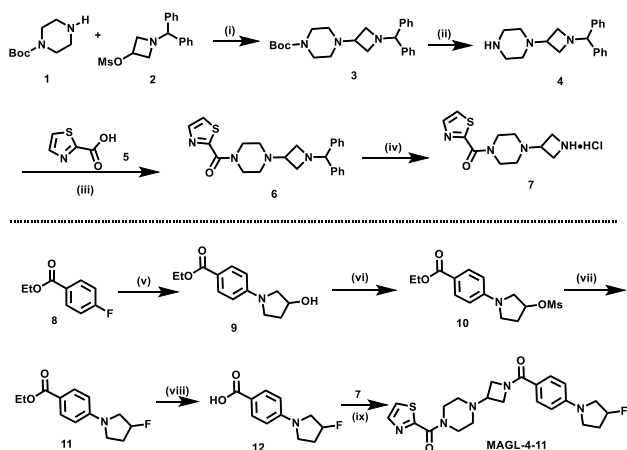

**Scheme S1** Synthesis of irreversible MAGL inhibitor (cold compound) MAGL-4-11.

Conditions: (i) DIPEA, MeCN, 80 °C for 12 h; 85% yield; (ii) TFA, CH<sub>2</sub>Cl<sub>2</sub>, rt, 12 h; 99% yield; (iii) HOBT, EDC·HCl, Et<sub>3</sub>N, DMF, rt, 12 h; 78% yield; (iv) 1-chloroethyl chloroformate, CH<sub>2</sub>Cl<sub>2</sub>, rt, 2 h; then MeOH, 35 °C 2 h; 86% yield; (v) pyrrolidin-3-ol hydrochloride, K<sub>2</sub>CO<sub>3</sub>, DMSO, 120 °C for 24 h; 79% yield; (vi) MsCl, Et<sub>3</sub>N, CH<sub>2</sub>Cl<sub>2</sub>, rt, overnight; 84% yield; (vii) TBAF, THF, 70 °C, 2 h; 38% yield; (viii) LiOH, THF/MeOH/H<sub>2</sub>O, 40 °C, 16 h; 92% yield; (ix) HOBT, EDC·HCl, Et<sub>3</sub>N, DMF, rt, 12 h; 30% yield; DIPEA = *N,N*-diisopropylethylamine; TFA = trifluoroacetic acid; HOBT = 1-hydroxybenzotriazole hydrate; EDC·HCl = *N*-(3-dimethylaminopropyl)-*N'*-ethylcarbodiimide hydrochloride; Et<sub>3</sub>N = triethylamine; DMF = *N,N*-dimethylformamide; DMSO = methyl sulfoxide; MsCl = methanesulfonyl chloride; TBAF = tetrabutylammonium fluoride.

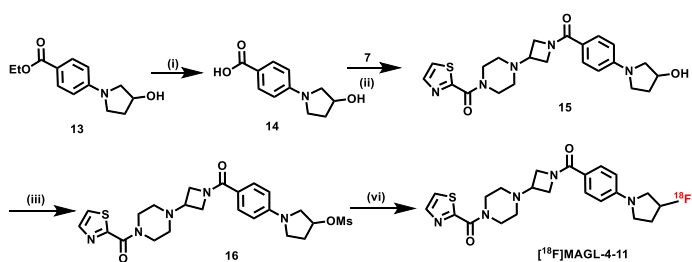

**Scheme S2** Synthesis of MAGL PET tracer [<sup>18</sup>F]MAGL-4-11. Conditions: (i) LiOH, THF/MeOH/H<sub>2</sub>O, 40 °C, overnight; 97% yield; (ii) HOBT, EDC•HCl, Et<sub>3</sub>N, DMF, rt, 12 h; 22% yield; (iii) MsCl, Et<sub>3</sub>N, CH<sub>2</sub>Cl<sub>2</sub>, rt, overnight; 70% yield; (vi) [<sup>18</sup>F]KF, DMSO, 120 °C, 10 min, 39% decay-corrected RCY. HOBT = 1-hydroxybenzotriazole hydrate; EDC•HCl = *N*-(3-dimethylaminopropyl)-*N'*-ethylcarbodiimide hydrochloride; DMF = *N,N*-dimethylformamide; DMSO = methyl sulfoxide; MsCl = methanesulfonyl chloride.

## Reference

1. Chen Z, Mori W, Deng X, Cheng R, Ogasawara D, Zhang G, et al. Design, synthesis, and evaluation of reversible and irreversible monoacylglycerol lipase positron emission tomography (PET) tracers using a “tail switching” strategy on a piperazinyl azetidine skeleton. *J Med Chem* 2019;**62**:3336-53.
